# Supplementary material for: Measuring the Performance of Vaccination Programs Using Cross-Sectional Surveys: A Likelihood Framework and Retrospective Analysis
Source: PLoS Med. 2011 Oct 25;8(10):e1001110. doi: 10.1371/journal.pmed.1001110 (PMC3201935; doi:10.1371/journal.pmed.1001110)
Supplement: Text S1 — Mathematical derivations. (PDF) [file pmed.1001110.s008.pdf]

# Supplement to “Measuring the performance of vaccination programs using cross-sectional surveys”: Mathematical Derivations

Justin Lessler      C. Jessica E. Metcalf      Rebecca F. Grais  
Francisco J. Luquero      Derek A.T. Cummings      Bryan T. Grenfell

## 1 Individual Vaccination Probability and Likelihood Formulation

The probability that an individual is vaccinated at age  $x$  is one minus the probability that they avoid vaccination during every vaccination activity to which they are exposed. Assume that there is some portion of the population,  $\rho$ , that is accessible to vaccination activities:

$$g(x; \rho) = 1 - \left[ (1 - \rho) + \rho \prod_{j=1}^m \Pr(\text{not vaccinated in } V_j | \text{accessible}) \right]$$

where  $V_1, \dots, V_m$  are all vaccination activities to which the child might have exposed. Let  $f(V_j)$  be the probability of not being vaccinated in activity  $j$  given that you are in the target population for that activity and in the accessible population. Let  $z_{ij} = 1$  if person  $i$  is in the target population for campaign  $j$ , and  $z_{ij} = 0$  otherwise. Hence:

$$g(x_i, \rho) = 1 - \left[ (1 - \rho) + \rho \prod_{j=1}^m f(V_j)^{z_{ij}} \right] \quad (1)$$

The probability of not being vaccinated given that you are in the accessible population,  $f(V_j)$  should be some function of the number of doses nominally distributed in campaign  $j$ ,  $v_j$ , and the size of the accessible target population for that activity,  $\rho N_j$ .

If all nominally distributed doses go into a unique vaccinee in the target population, then  $f(v_j, \rho N_j) = 1 - v_j/(\rho N_j)$ . However, it seems we can assume that all nominally distributed doses do not result in a unique vaccinee within the target population. If we consider our doses to be a sequence,  $k = 0 \dots (v_j - 1)$ , it further seems reasonable to assume that the chances of the first dose in this sequence is more likely to result in a unique vaccinee than later doses. This effect can be captured by the equation:

$$f(v_j, \rho N_j) = \prod_{k=0}^{v_j-1} \left( 1 - \frac{1}{\rho N_j - k(1 - \psi)} \right) \quad (2)$$

where  $\psi$  is a discount factor on how much the effective denominator changes on additional doses. That is, the term  $-k(1 - \psi)$  denotes how much the effective denominator (i.e., the number of people competing for doses) decreases because  $k$  doses have been given. If a campaign is perfect, then  $\psi = 0$ , and each dose in the sequence decreases the denominator by exactly 1 (and  $f(v_j, \rho N_j) = 1 - v_j/(\rho N_j)$ ). If a campaign is effectively at random (i.e., the fact that doses have been previously distributed does not increase a new person's chance of receiving the next dose) then  $\psi = 1$ , and the probability of receiving (or avoiding) a dose remains constant. We would expect most vaccination activities to fall somewhere in this range. However, while it may be unlikely, we can even imagine a situation where there are “vaccine hungry” individuals who try to get vaccinated as many times as possible. In this case  $\psi > 1$ , and subsequent doses are even less likely to result in a unique vaccinee. Because values of  $\psi$  less than 0 are nonsensical (no dose can result in more than 1 vaccinee), we restate  $\psi$  in terms of  $\alpha$ :

$$\psi = e^\alpha$$

We will use  $e^\alpha$  instead of  $\psi$  throughout the supplement. Equation 1 now becomes:

$$g(x_i; \rho, \alpha) = 1 - \left[ (1 - \rho) + \rho \prod_{j=1}^m \left( \prod_{k=0}^{v_j-1} \left( 1 - \frac{1}{\rho N_j - k(1 - e^\alpha)} \right) \right)^{z_{ij}} \right] \quad (3)$$

This equation can be further simplified by finding a closed form solution for the inner product as detailed in section 2 below.

In a cross sectional survey we observe a set of individuals with ages  $\mathbf{x} = \{x_1, \dots, x_n\}$  and corresponding vaccination statuses  $\mathbf{y} = \{y_1, \dots, y_n\}$ , where  $y_i = 1$  denotes having ever been vaccinated, and  $y_i = 0$  denotes having never been vaccinated. If we assume all  $y_i$  are independent events, then the likelihood of observing the cross sectional data given  $\rho$  and  $\alpha$  is:

$$L(\rho, \alpha; \mathbf{x}, \mathbf{y}) = \prod_{i=1}^n g(x_i; \rho, \alpha)^{y_i} (1 - g(x_i; \rho, \alpha))^{1-y_i} \quad (4)$$

## 2 Derivation of Simplified Form for Vaccination Probability

The probability that person  $i$  is vaccinated is:

$$g(x_i; \rho, \alpha) = 1 - \left[ (1 - \rho) + \rho \prod_{j=1}^m \left( \prod_{k=0}^{v_j-1} \left( 1 - \frac{1}{\rho N_j - k(1 - e^\alpha)} \right) \right)^{z_{ij}} \right] \quad (5)$$

$$= \rho - \rho \prod_{j=1}^m \left( \prod_{k=0}^{v_j-1} \left( 1 - \frac{1}{\rho N_j - k(1 - e^\alpha)} \right) \right)^{z_{ij}} \quad (6)$$

$$= \rho \left( 1 - \prod_{j=1}^m \left( \prod_{k=0}^{v_j-1} \left( 1 - \frac{1}{\rho N_j - k(1 - e^\alpha)} \right) \right)^{z_{ij}} \right) \quad (7)$$

Let the portion of this equation that depends on  $v_j$  and  $\rho N_j$  be designated  $f(v_j, \rho N_j)$ :

$$f(v_j, \rho N_j) = \prod_{k=0}^{v_j-1} \left( 1 - \frac{1}{\rho N_j - k(1 - e^\alpha)} \right) \quad (8)$$

Dropping the subscripts and taking  $\rho N_j = N$  for convenience, note that:

$$\begin{aligned} f(v, N) &= \prod_{k=0}^{v-1} \left( 1 - \frac{1}{N - k(1 - e^\alpha)} \right) \\ &= \prod_{k=0}^{v-1} \frac{N - k(1 - e^\alpha) - 1}{N - k(1 - e^\alpha)} \\ &= \prod_{k=0}^{v-1} \frac{1 - \frac{k}{N}(1 - e^\alpha) - \frac{1}{N}}{1 - \frac{k}{N}(1 - e^\alpha)} \end{aligned}$$

Let  $q = v/N$  and  $a = (1 - e^\alpha)$ :

$$\begin{aligned}
f(v, N) &= f(qN, N) \\
&= \prod_{k=0}^{qN-1} \frac{1 - \frac{k}{N}a - \frac{1}{N}}{1 - \frac{k}{N}a} \\
&= \left( \prod_{k=0}^{qN-2} \frac{1 - \frac{k}{N}a - \frac{1}{N}}{1 - \frac{k}{N}a} \right) \left( \frac{1 - \frac{qN-1}{N}a - \frac{1}{N}}{1 - \frac{qN-1}{N}a} \right) \\
&= \left( \prod_{k=0}^{qN-2} \frac{1 - \frac{k}{N}a - \frac{1}{N}}{1 - \frac{k}{N}a} \right) \left( \frac{1 - qa + \frac{a}{N} - \frac{1}{N}}{1 - qa + \frac{a}{N}} \right) \\
&= \prod_{k=1}^{qN} \frac{1 - qa + \frac{ka}{N} - \frac{1}{N}}{1 - qa + \frac{ka}{N}}
\end{aligned}$$

Hence:

$$\begin{aligned}
\log f(qN, N) &= \sum_{k=1}^{qN} \log \left( 1 - qa + \frac{ka}{N} - \frac{1}{N} \right) - \sum_{k=1}^{qN} \log \left( 1 - qa + \frac{ka}{N} \right) \\
&= \frac{N}{a} \left[ \frac{a}{N} \sum_{k=1}^{qN} \log \left( 1 - qa + \frac{ka}{N} - \frac{1}{N} \right) - \frac{a}{N} \sum_{k=1}^{qN} \log \left( 1 - qa + \frac{ka}{N} \right) \right]
\end{aligned}$$

Hence, by the rectangular quadrature formula:

$$\begin{aligned}
\log f(qN, N) &\approx \frac{N}{a} \left[ \int_{1-qa+\frac{a}{N}-\frac{1}{N}}^{1-\frac{1}{N}} \log x dx - \int_{1-qa+\frac{a}{N}}^1 \log x dx \right] \\
&= \frac{N}{a} \left[ [x \log x - x]_{1-qa+\frac{a}{N}-\frac{1}{N}}^{1-\frac{1}{N}} - [x \log x - x]_{1-qa+\frac{a}{N}}^1 \right] \\
&= \frac{N}{a} \left[ \left(1 - \frac{1}{N}\right) \log \left(1 - \frac{1}{N}\right) - \left(1 - \frac{1}{N}\right) \right. \\
&\quad - \left(1 - qa + \frac{a}{N} - \frac{1}{N}\right) \log \left(1 - qa + \frac{a}{N} - \frac{1}{N}\right) + \left(1 - qa + \frac{a}{N} - \frac{1}{N}\right) \\
&\quad \left. - 1 \log 1 + 1 + \left(1 - qa + \frac{a}{N}\right) \log \left(1 - qa + \frac{a}{N}\right) - \left(1 - qa + \frac{a}{N}\right) \right] \\
&= \frac{N}{a} \left[ \left(1 - \frac{1}{N}\right) \log \left(1 - \frac{1}{N}\right) + \right. \\
&\quad - \left(1 - qa + \frac{a}{N} - \frac{1}{N}\right) \log \left(1 - qa + \frac{a}{N} - \frac{1}{N}\right) \\
&\quad \left. + \left(1 - qa + \frac{a}{N}\right) \log \left(1 - qa + \frac{a}{N}\right) \right] \\
&= \frac{N}{a} \log \left(1 - \frac{1}{N}\right) - \frac{1}{a} \log \left(1 - \frac{1}{N}\right) - \frac{N}{a} \log \left(1 - qa + \frac{a}{N} - \frac{1}{N}\right) \\
&\quad + Nq \log \left(1 - qa + \frac{a}{N} - \frac{1}{N}\right) - \log \left(1 - qa + \frac{a}{N} - \frac{1}{N}\right) \\
&\quad + \frac{1}{a} \log \left(1 - qa + \frac{a}{N} - \frac{1}{N}\right) + \frac{N}{a} \log \left(1 - qa + \frac{a}{N}\right) \\
&\quad - Nq \log \left(1 - qa + \frac{a}{N}\right) + \log \left(1 - qa + \frac{a}{N}\right)
\end{aligned}$$

Therefore (see limit calculations below):

$$\begin{aligned}
\lim_{N \rightarrow \infty} \log f(qN, N) &= \frac{1}{a} \lim_{N \rightarrow \infty} N \log \left( 1 - \frac{1}{N} \right) \\
&\quad - \left( \frac{1}{a} - q \right) \lim_{N \rightarrow \infty} N \log \left( 1 - qa + \frac{a}{N} - \frac{1}{N} \right) \\
&\quad + \frac{1}{a} \log(1 - qa) \\
&\quad + \left( \frac{1}{a} - q \right) \lim_{N \rightarrow \infty} N \log \left( 1 - qa + \frac{a}{N} \right) \\
&= -\frac{1}{a} - \left( \frac{1}{a} - q \right) \frac{a-1}{1-qa} + \frac{1}{a} \log(1 - qa) + \left( \frac{1}{a} - q \right) \frac{a}{1-qa} \\
&= \frac{1}{a} \log(1 - qa)
\end{aligned}$$

Therefore:

$$\begin{aligned}
\lim_{N \rightarrow \infty} f(qN, N) &= (1 - qa)^{1/a} \\
&= (1 - q(1 - e^\alpha))^{1/(1-e^\alpha)}
\end{aligned}$$

Note that the above expression is undefined when  $\alpha = 0$ . However:

$$\lim_{a \rightarrow 0} \frac{\log(1 - qa)}{a} = \lim_{a \rightarrow 0} \frac{1}{1 - qa} (-q) = -q$$

Therefore, for large  $N$ :

$$f(v, N) \approx \begin{cases} e^{-v/N} & \text{if } \alpha = 0 \\ \left( 1 - \frac{v}{N}(1 - e^\alpha) \right)^{1/(1-e^\alpha)} & \text{otherwise} \end{cases} \quad (9)$$

And:

$$g(x_i; \rho, \alpha) \approx \begin{cases} \rho \left[ 1 - \prod_{j=1}^m (e^{-v_j/\rho N_j})^{z_{ij}} \right] & \text{if } \alpha = 0 \\ \rho \left[ 1 - \prod_{j=1}^m \left( \left( 1 - \frac{v_j}{\rho N_j}(1 - e^\alpha) \right)^{1/(1-e^\alpha)} \right)^{z_{ij}} \right] & \text{otherwise} \end{cases} \quad (10)$$

Note that this convergence appears to occur very quickly. Empirically, it appears that this value is accurate to three decimal places for  $N > 100$  in sample scenarios.

## LIMITS USING L'HOSPITAL RULE

$$\lim_{N \rightarrow \infty} N \log \left( 1 - \frac{1}{N} \right) = \lim_{x \rightarrow 0} \frac{(\log(1-x))'}{x'} = \lim_{x \rightarrow 0} \frac{1}{1-x}(-1) = -1$$

$$\begin{aligned} \lim_{N \rightarrow \infty} N \log \left( 1 - qa + \frac{a}{N} - \frac{1}{N} \right) &= \lim_{x \rightarrow 0} \frac{(\log(1 - qa + ax - x))'}{x'} = \lim_{x \rightarrow 0} \frac{1}{1 - qa + ax - x}(a - 1) \\ &= \frac{a - 1}{1 - qa} \end{aligned}$$

$$\begin{aligned} \lim_{N \rightarrow \infty} N \log \left( 1 - qa + \frac{a}{N} \right) &= \lim_{x \rightarrow 0} \frac{(\log(1 - qa + \frac{a}{N}))'}{x'} = \lim_{x \rightarrow 0} \frac{1}{(1 - qa + \frac{a}{N})}(a) \\ &= \frac{a}{1 - qa} \end{aligned}$$

## 3 Individual Campaign Coverage

Denote the actual coverage of a campaign  $j$  to be  $c_j$ . Note that  $c_j$  is the probability of a person covered only by campaign (or pseudo-campaign)  $j$  being vaccinated. Hence:

$$c_j = \begin{cases} \rho \left[ 1 - e^{-v_j/\rho N_j} \right] & \text{if } \alpha = 0 \\ \rho \left[ 1 - \left( 1 - \frac{v_j}{\rho N_j} (1 - e^\alpha) \right)^{1/(1-e^\alpha)} \right] & \text{otherwise} \end{cases} \quad (11)$$

## 4 Routine Vaccination

Routine vaccination differs from campaigns in that children are vaccinated over a much larger time scale than is true of campaigns. However, routine vaccination can be modeled within our framework as a special type or vaccination activity.

Consider  $R$  years of routine vaccination activity,  $1 \dots R$ . Denote the event of a member of the accessible population having the “opportunity” for vaccination during year  $j$  of routine vaccination as  $O_j$  and assume that each individual only has one routine vaccination opportunity. Further, assume that if the routine vaccination opportunity occurs during a given year then the probability of avoiding vaccination during that opportunity follows the same general form for activities:

$$\Pr(\text{not vaccinated by routine} | O_j) = f(v_j, \rho N_j)$$

If we let  $\Pr(\bar{O})$  be the probability of having not yet had the opportunity for routine

vaccination, then:

$$\Pr(\text{not vaccinated by routine}) = \Pr(\bar{O}) + \sum_{j=1}^R f(v_j, \rho N_j) \Pr(O_j)$$

If we assume that each child has a probability  $F_R(x)$  be the probability of having had your routine vaccination probability by age  $x$ . The the probability that person  $i$  is not vaccinated in a routine campaign is:

$$f_R(x_i, \mathbf{v}, \mathbf{N}) = (1 - F_R(x_i)) + \sum_{j=1}^R f(v_j, \rho N_j) (F_R(x_{ij} + l_j) - F_R(x_{ij})) \quad (12)$$

where  $x_{ij}$  is person  $i$ 's age at the beginning of routine vaccination year  $j$  and  $l_j$  is the length of vaccination year  $j$  (12 months for all years except for the year the data was collected). In other words, routine vaccination becomes a pseudo-campaign representing the weighted sum of the coverage in all of the years of routine vaccination, where the weights represent the probability that routine vaccination happened in that year:

$$f_R(x_i, \mathbf{v}, \mathbf{N}) = w_i^* + \sum_{j=1}^R w_{ij} f(v_j, \rho N_j) \quad (13)$$

$$w_{ij} = F_R(x_{ij} + l_j) - F_R(x_{ij}) \quad (14)$$

$$w_i^* = 1 - F_R(x_i) \quad (15)$$

And the probability for vaccination for a given individual becomes:

$$g(x_i; \rho, \alpha) = \rho \left[ 1 - f_R(x_i, \mathbf{v}_R, \mathbf{N}_R) \prod_{j=1}^m f(v_j, \rho N_j) \right] \quad (16)$$

where  $m$  now represents the number of proper campaigns  $\mathbf{v}_R$  and  $\mathbf{N}_R$  are the number of doses distributed during routine vaccination activities.
